# Supplementary material for: Three-Dimensional Reconstruction of the Bony Nasolacrimal Canal by Automated Segmentation of Computed Tomography Images
Source: PLoS One. 2016 May 17;11(5):e0155436. doi: 10.1371/journal.pone.0155436 (PMC4871497; doi:10.1371/journal.pone.0155436)
Supplement: S3 File — (XLSX) [file pone.0155436.s003.xlsx]

## Sheet: der
SUBJECT #	13				17				19				23				26				29
x_spacing	0.380859				0,417969				0,332031				0,292969				0,343750				0,339844
y_spacing	0.380859				0,417969				0,332031				0,292969				0,343750				0,339844
z_spacing	0.625				0.625				0.625				0.625				0.625				0.625
	centroid coordinates				centroid coordinates				centroid coordinates				centroid coordinates				centroid coordinates				centroid coordinates
	row	column	slice #		row	column	slice #		row	column	slice #		row	column	slice #		row	column	slice #		row	column	slice #
	120.458	223.839	39		131.766	221.277	89		72.2984	214.625	18		55.1883	222.781	14		92.5526	221.468	4		92.4585	230.744	19
	116.75	223.586	40		129.432	221.119	90		69.4447	213.971	19		48.7965	221.083	15		87.441	220.972	5		89.0605	230.265	20
	112.006	223.119	41		127.39	221.057	91		66.8614	213.524	20		40.7685	219.197	16		84.8144	220.826	6		86.1965	230.191	21
	110.316	223.361	42		124.504	220.805	92		64.1854	213.083	21		35.2952	218.175	17		82.5535	220.772	7		83.1971	230.438	22
	109.393	223.293	43		122.811	220.667	93		61	213.043	22		32	217.141	18		77.75	219.655	8		82.0534	230.344	23
	108.648	223.586	44		121.729	220.965	94		58.4123	212.921	23		28.9062	216.432	19		76.0207	219.876	9		80.4959	230.438	24
	107.642	223.629	45		120.683	221.127	95		55.9561	212.961	24		27.4335	216.547	20		74.7353	219.978	10		79.1652	230.4	25
	106.953	223.777	46		119.58	221.148	96		54.1741	212.895	25						73.0308	220.546	11		77.7522	230.504	26
	105.921	224.27	47		118.798	221.179	97		52.267	212.681	26						71.1167	220.583	12		76.7583	230.525	27
	104.881	224.656	48		117.976	221.41	98		50.4413	212.749	27						70.0813	220.553	13		75.6923	230.538	28
	104.313	225.259	49		117.038	221.551	99		48.954	212.845	28						68.25	220.567	14		74.2087	230.609	29
	103.491	225.514	50		115.862	221.562	100		47.6281	212.951	29						67.1066	220.508	15		73.0171	230.59	30
					115	221.584	101		46.6115	213.261	30						66.1301	220.659	16		71.7436	230.598	31
					114.125	221.438	102		45.5352	213.38	31						64.7881	220.686	17		70.5082	230.697	32
					113.558	221.442	103		44.1231	213.654	32						63.4661	220.881	18		69.6587	230.587	33
					113.065	222.156	104		43.627	214.119	33						62.2266	220.57	19		69	230.774	34
					112.76	222.373	105										61.1449	220	20		68.3971	231.022	35
					112.295	222.692	106										60.1342	219.429	21		67.5882	231.933	36
					112.179	223.209	107										59.6037	218.976	22		66.2701	232.212	37
					111.583	223.847	108										59.3198	218.674	23		65.5152	232.485	38
					111.155	224.775	109										58.6208	218.005	24
